# Supplementary material for: Enhancing Polyvinyl Alcohol Nanocomposites with Carboxy-Functionalized Graphene: An In-Depth Analysis of Mechanical, Barrier, Electrical, Antibacterial, and Chemical Properties
Source: MDPI journal article supplement (doi:10.3390/polym16081070), 2024-04-11
Supplement: s1 [file s1]

# Supplementary materials

**Table S1.** Mechanical properties of PVA and nanocomposite 3%MG/PVA.

| Sample    | Process  | Tensile strength<br>(MPa) | Yield strength<br>(MPa) | Elongation at break<br>(%) |
|-----------|----------|---------------------------|-------------------------|----------------------------|
| Process 1 | U1+U2    | 43.1±1.9                  | 21.8±1.1                | 31.5±6.2                   |
| Process 2 | U2+U3    | 45.6±2.5                  | 22.3 ±2.4               | 35.9±5.8                   |
| Process 3 | U1+U3    | 34.7±3.6                  | 18.6±2.6                | 27.4±4.4                   |
| Process 4 | U1+U2+U3 | 46.8±2.3                  | 23.5±3.1                | 35.7±5.6                   |
